# Variant-driven multi-wave pattern of COVID-19 via Machine Learning clustering of spike protein mutations

Adele de Hoffer<sup>1,+</sup>, Shahram Vatani<sup>2,3,+</sup>, Corentin Cot<sup>2,3,+</sup>, Giacomo Cacciapaglia<sup>2,3,\*</sup>, Francesco Conventi<sup>4,5</sup>, Antonio Giannini<sup>4,6</sup>, Stefan Hohenegger<sup>2,3</sup>, and Francesco Sannino<sup>4,6,7,8,\*</sup>

<sup>1</sup>Politecnico di Torino, Corso Duca degli Abruzzi 24, 10129 Torino, Italy

<sup>2</sup>Institut de Physique des 2 Infinis (IP2I), CNRS/IN2P3, UMR5822, 69622 Villeurbanne, France

<sup>3</sup>Université de Lyon, Université Claude Bernard Lyon 1, 69001 Lyon, France

<sup>4</sup>INFN sezione di Napoli, Complesso Universitario di Monte S. Angelo Edificio 6, via Cintia, 80126 Napoli, Italy

<sup>5</sup>Università di Napoli Parthenope, Napoli NA, Italy

<sup>6</sup>Dipartimento di Fisica E. Pancini, Università di Napoli Federico II, Complesso Universitario di Monte S. Angelo Edificio 6, via Cintia, 80126 Napoli, Italy

<sup>7</sup>Scuola Superiore Meridionale, Largo S. Marcellino 10, 80138 Napoli NA, Italy

<sup>8</sup>CP3-Origins & the Danish Institute for Advanced Study, University of Southern Denmark, Campusvej 55, DK-5230 Odense, Denmark

\*g.cacciapaglia@ipnl.in2p3.fr, sannino@cp3.sdu.dk

+these authors contributed equally to this work

## ABSTRACT

Never before such a vast amount of data has been collected for any viral pandemic than for the current case of COVID-19. This offers the possibility to answer a number of highly relevant questions, regarding the evolution of the virus and the role mutations play in its spread among the population. We focus on spike proteins, as they bear the main responsibility for the effectiveness of the virus diffusion by controlling the interactions with the host cells. Using the available temporal structure of the sequencing data for the SARS-CoV-2 spike protein in the UK, we demonstrate that every wave of the pandemic is dominated by a different variant. Consequently, the time evolution of each variant follows a temporal structure encoded in the epidemiological Renormalisation Group approach to compartmental models. Machine learning is the tool of choice to determine the variants at play, independent of (but complementary to) the virological classification. Our Machine Learning algorithm on spike protein sequencing provides a simple and unbiased way to identify, classify and track relevant virus variants without any prior knowledge of their characteristics. Hence, we propose a new tool that can help preventing and forecasting the emergence of new waves, and that can be used by decision makers to define short and long term strategies to curb the current COVID-19 pandemic or future ones.

## Highlights

- **Objectives** To study the relation between mutations of SARS-CoV-2, the emergence of relevant variants and the multi-wave pattern of the COVID-19 pandemic.
- **Setting** Genomic sequencing of the SARS-CoV-2 spike proteins in the UK nations (England, Scotland, Wales). Epidemiological data for the number of infections in the UK nations, South Africa, California and India.
- **Methodology** We designed a simple Machine Learning algorithm based on the Levenshtein distance on the spike protein sequences to cluster the available dataset and define variants. We set up a time-sensitive procedure that allows to define a variant as a chain of subsequent clusters. The Mutation epidemiological Renormalisation Group (MeRG) framework is used to describe the epidemiological data.
- **Results** Our analysis of the sequencing data from England, Wales and Scotland shows that:

1. A Machine Learning analysis based only on the spike proteins allows to efficiently identify the variants of concern and of interest, as well as other variants relevant for the diffusion of the virus.

2. We identify a branching relation between variants, thus reconstructing the phylogeny of the main variants.
3. Comparison with the epidemiological data demonstrates that each new wave is dominated by a new emerging variant, thus confirming the hypothesis that there is a strong correlation between the emergence of variants and the multi-wave pattern.
4. The number of infected by each variant can be modelled via an independent logistic function (sigmoid), thus confirming the MeRG approach. Analyses of the epidemiological data for South Africa, California and India further corroborate this result.

- **Conclusions** Using a simple Machine Learning algorithm, we are able to identify, classify and track relevant virus variants without any prior knowledge of their characteristics. While our analysis is only based on spike protein sequencing and is unbiased, the results are validated by other informed methods based on the complete genome. By correlating the variant definition to epidemiological data, we discover that each new wave of the COVID-19 pandemic is driven and dominated by a new emerging variant, as identified by our Machine Learning analysis. The results are seminal to the development of a new strategy to study how SARS-CoV-2 variants emerge and to predict the characteristics of future mutations of the spike proteins. Furthermore, the same methodology can be applied to other viral diseases, like influenza, if sufficient sequencing data is available. Hence, we provide an effective and unbiased method to identify new emerging variants that can be responsible for the onset of a new epidemiological wave. Our Machine Learning strategy is, in fact, a new tool that can help preventing and forecasting the emergence of new waves, and it can be used by decision makers to define short and long term strategies to curb the current COVID-19 pandemic or future ones.

## Introduction

It is of primary importance to understand the diffusion of a virus and its variants, especially in view of an efficient vaccination campaign. This task has been difficult in the past, mainly due to the scarce data available for extended pandemics caused by infectious diseases, like for instance the “Spanish” Influenza of 1918-19<sup>1</sup>. COVID-19 is revolutionising our understanding of pandemics because we have now access to real time data about, for example, the genome sequencing of the virus and its proteins. Among the latter, spike proteins play a special role, as they are responsible for the interaction between the virus and the host cells, and for the effectiveness of the virus in spreading and multiplying. Like other coronaviruses, the SARS-CoV-2 virus has relatively low mutation rates<sup>2</sup>, nevertheless the current COVID-19 pandemic has seen the emergence of epidemiologically relevant variants. Genomic sequencing has allowed to track the mutations of the spike proteins, and to identify potentially dangerous variants<sup>3,4</sup> that may have an increased infectivity compared to the initial form. Since the second half of 2020, variants of concern (VoC) and of interest (VoI) have been identified in various regions of the world: for instance, the Alpha VoC (B.1.1.7, GRY), first identified in September 2020 in the UK<sup>5,6</sup>; the Beta VoC (B.1.351, GH/501Y.V2) first found in South Africa in May 2020<sup>7</sup>; the Gamma VoC (P.1, GR/501Y.V3) first detected in Brazil in November 2020<sup>8</sup>, which has been spreading in Manaus notwithstanding the high rate of previous infections; the Delta VoC (B.1.617.2, G/478K.V1) identified in India in October 2020; and the Epsilon VoI (B.1.427+429, GH/452R.V1) found in California in March 2020<sup>9</sup>. An exhaustive list can be found on the WHO website ([www.who.int/en/activities/tracking-SARS-CoV-2-variants/](http://www.who.int/en/activities/tracking-SARS-CoV-2-variants/)). Note that we follow the WHO naming scheme<sup>10</sup>, while indicating in parenthesis the classification from the Pango lineage<sup>11</sup> and GISAID<sup>12,13</sup>. Considering the Alpha VoC as an example, it has been possible to study in the lab its infectious power, finding a higher rate of transmission by  $67 \div 75\%$ , compared to the previous ones<sup>6</sup>. The transmission advantage has been confirmed by epidemiological data in the UK<sup>14</sup>. Most analyses of the epidemiological data are done applying the time-honoured compartmental models of the SIR type<sup>15-17</sup>, appropriately extended by including more compartments<sup>18</sup>. The main drawback in this approach is the large number of parameters, which need to be fixed by hand or extracted from the data. In this work, we want to bypass this difficulty by using a simplified and effective approach based on theoretical physics methods, the epidemic Renormalisation Group (eRG) framework<sup>19-21</sup>, combined with information directly extracted from the spike protein sequencing via a simple Machine Learning approach. This novel method allowed us to analyse, at the same time, the variant structure of SARS-CoV-2 in multiple countries and regions of the world, and thus provide a direct comparison of their epidemiological impact. A theoretical analysis of the variants within the eRG framework is presented in a companion publication<sup>22</sup>.

We first collect the spike protein sequencing data for the UK nations from the GISAID repository<sup>12,13</sup>. For each nation we analyse the data via a simple Machine Learning (ML) algorithm based on the Levenshtein measure (LM)<sup>23,24</sup>, which quantifies the difference between two strings of text. This ML approach has been long used, greatly refined and optimised, in biology<sup>25</sup>,

81 while more recently deep learning approaches<sup>26–28</sup> are becoming more effective. In the present work, we decided to rely on  
82 the original definition of LM in order to cluster protein sequences based on the number of mutations needed to connect them.  
83 Following this approach, we introduce a neat mathematical definition of a virus variant in terms of the LM across the various  
84 spike protein sequences. A variant is, therefore, defined as an ensemble of sequences that are relatively close to each other. In  
85 contrast, a mutation is a single change in the amino-acid sequence of the protein. Our approach is, therefore, complementary to  
86 that of the many packages used in computational biology<sup>29–31</sup>, which focus on the alignment and similarity between the mRNA  
87 sequences and aim at reconstructing the phylogenetic relation between them.

88 The procedure above is independently repeated for each geographical region in our study. We start by considering first the  
89 whole available dataset and then dividing the sequencing per month. This allows us to follow the evolution of the variants and  
90 construct chains connecting the clusters we identify by month. We validate our results by showing that our approach identifies  
91 the Alpha VoC in all the distinct UK regions we study. Once the dominant variants are identified we analyse their temporal  
92 spreading within the affected population. Given that only a small fraction of the infected individuals have their viral charge  
93 sampled and sequenced, we estimate the number of people infected by each variant by multiplying the number of positive tests  
94 by the rate of occurrence of each variant in the sequencing data. This rough approximation allows us to reliably extract the  
95 temporal evolution of each variant in the population. Note that each infected individual is, in practice, associated to the variant  
96 that is dominant in their viral charge, following the practice of the sequence reporting. Thus, the data we use track the time  
97 development of the dominance of each variant at the individual level.

98 To analyse the time evolution of the individuals infected by each variant, we employ the economical eRG approach<sup>19</sup> that  
99 allows to organise the pandemic waves according to temporal symmetry principles stemming from high energy physics<sup>32,33</sup>.  
100 The approach has been extensively tested<sup>21,34</sup>, confronted with traditional SIR compartmental models<sup>35</sup>, and, last but not  
101 least, summarised in a comprehensive review alongside other approaches<sup>36</sup>. The economy of the model rests in the fact  
102 that, once fixed the overall number of infected, the diffusion rate of the virus is encoded in a single parameter  $\gamma$ . The latter  
103 measures the speed at which the virus spreads in the population. This value can be extracted by fitting the new daily infected  
104 (or equivalently the cumulated number of infections). We remark that this approach can be put in correspondence to a SIR  
105 model with time-dependent reproduction number  $R_0(t)$ <sup>35</sup>, which fits the data better than traditional compartmental models  
106 with constant parameters. We apply the eRG to each variant, thus yielding a classification of their aggressiveness via a single  
107 quantifier: their individual  $\gamma$ . A visual summary of the methodology followed by our analysis is shown in Fig. 1, while more  
108 details are reported in the supplementary material.

109 The main goal of this work is to understand the viral dynamics that characterises wave patterns stemming from infectious  
110 diseases like COVID-19. The eRG approach additionally offers a natural mathematical understanding in terms of dynamical  
111 flows of the system<sup>37,38</sup>. Importantly, by employing ML analysis to genomic data, we discover that each pandemic wave is  
112 driven by a single dominant variant. The findings demonstrate that the variant dynamics is one of the main engines behind the  
113 emergence of wave patterns for COVID-19. This result can be used as a template for similar infectious diseases. As direct  
114 consequence of our studies we arrive at a novel evolutionary model for the interpretation of the virus diffusion that is mutation  
115 driven.

## 116 Results

117 The spike protein sequences are extracted, country by country, from the GISAID repository: the data contains the full amino-acid  
118 structure of the protein and a date-stamp from the laboratory where the sampling was done. The latter allows us to study the  
119 time evolution of each variant. Note that each genome corresponds to the dominant mutation occurring in a single infected  
120 individual. The dataset is pruned to remove potentially incomplete sequences. We then apply our ML approach to cluster the  
121 various sequences in variants. First, we computed the LM between each pair of sequences, thus counting without any weight  
122 the minimal number of mutations (substitutions, deletions and insertions) that are needed to transition from one sequence to  
123 the other. Secondly, the algorithm constructs a tree of proximity by pairing sequences that are the closest to each other into a  
124 higher branch. To combine branches that contain more than one sequence, we use the Ward's method, after having checked  
125 that other choices do not significantly affect the results (more details in the supplementary material). The tree is completed  
126 when all sequences are grouped into a single cluster. To define the variants, we consider a cut in the distance so that branches  
127 whose Ward distance is larger than the cut are considered as separate variants. To keep the results simple, and free from  
128 biases, we base our analysis on the traditional Levenshtein distance between sequences, without introducing weights which  
129 are commonly adopted in computational biology. Furthermore, we apply the same cut to all branches. As England has the  
130 largest available sequencing sample, with 436.073 sequences as of the end of June, we will mainly focus on this dataset. This  
131 minimises statistical and sampling bias errors. After pruning, i.e. removing all sequences with less than 1.250 amino-acids and  
132 missing reported ones, 329.384 sequences are retained, out of which we identify 9.480 different ones.

133 As a first step, we apply the ML algorithm to all sequences. The clustering is done on the dataset that contains only different  
134 sequences for the spike proteins to reduce the number of data points. After defining the clustering, the number of total sequences

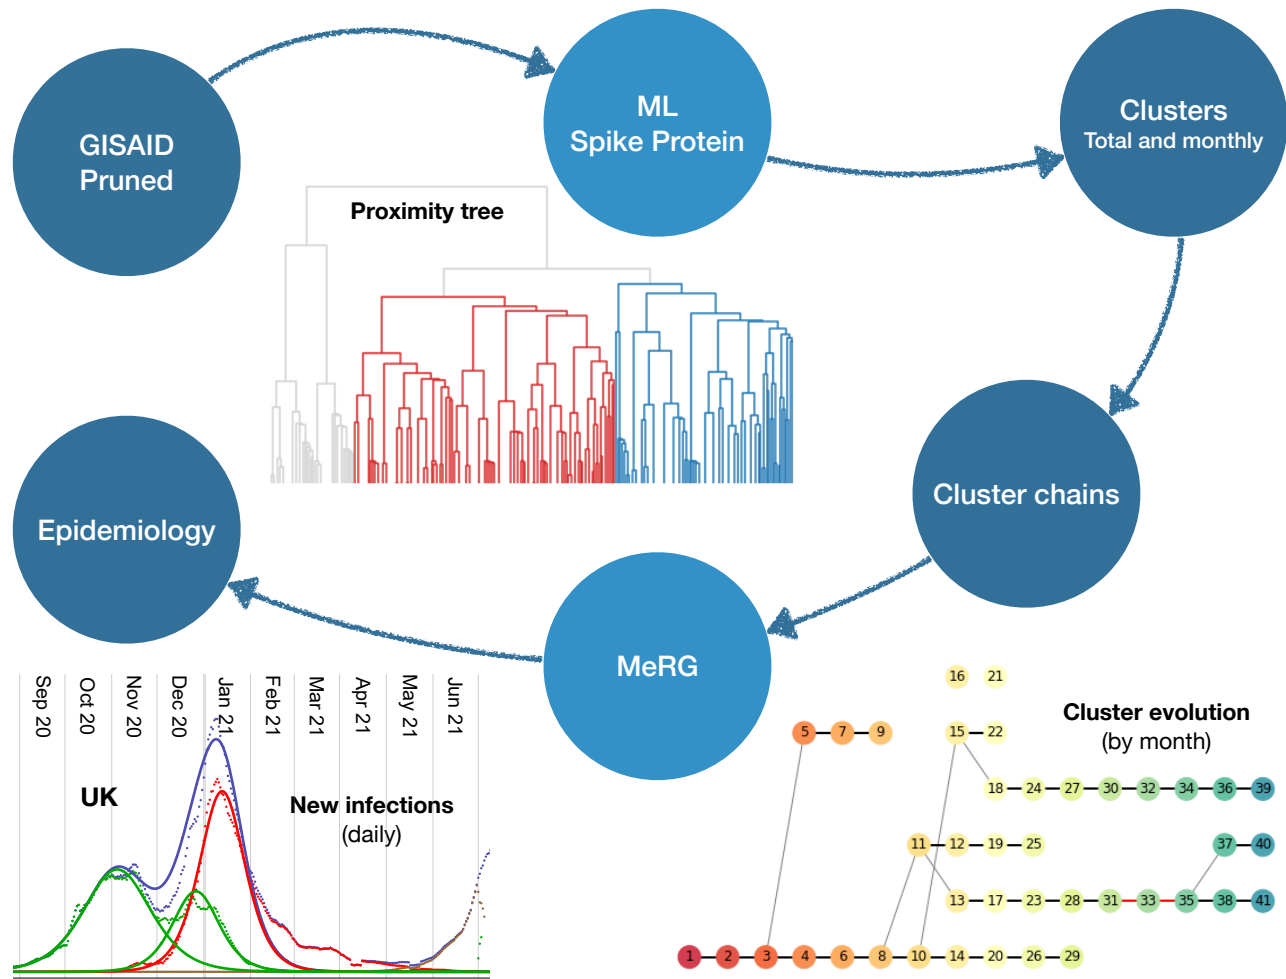

**Figure 1. Methodology.** Schematic representation of the methodology we follow.

135 in each cluster is counted, after pruning, to obtain the frequency for the occurrence of each cluster over time. The results are  
 136 shown in Fig. 2 for two choices of the cut in the Ward distance  $r_W$ :  $r_W = 50$  in the left plots and  $r_W = 100$  in the right plots.  
 137 We consider as relevant clusters only the ones that contain at least 1% of the sequences within the full dataset. We identify,  
 138 therefore, 5 clusters for the lower cut (v0, v1a, v1b, v2, v3), and 4 for the upper cut (v0, v1, v2, v3). Increasing the cut allows  
 139 to merge the clusters v1a and v1b into v1. Interestingly, the cluster v2 corresponds to the Alpha VoC: we have verified that  
 140 the frequency of occurrence matches the one of the VoC tagging in the GISAID dataset, and furthermore checked that the  
 141 most common sequence in the cluster v2 features the mutations associated with the Alpha VoC. Furthermore, the variant v3  
 142 corresponds to the Delta VoC, which is currently spreading in the UK. We also checked that by increasing the  $r_W$  cut, it is v0  
 143 and v1 that merge into a single variant, while v3 remains separated. In the middle plots of Fig. 2 we report our estimate of the  
 144 number of daily new infections in each clustered variant, computed by multiplying the measured frequency in the sequencing  
 145 dataset with the reported number of new infections. We observe that each wave can be associated with a different dominant  
 146 variant: v0 for the first wave occurring in March-May 2020; v1 for the second wave in October-November 2020; v2 (the Alpha  
 147 VoC) for the third wave in December-February 2021; and v3 for the last wave starting in May-June 2021. This feature supports  
 148 the hypothesis that the occurrence of a new wave is related to the emergence of a new variant.

149 Before further analysing the data, we validated our method by comparing the variant definition, associated to the clusters  
 150 in our analysis, to more standard methods used in computational biology. For this purpose, we have chosen the clade  
 151 classification<sup>40</sup>, as defined by the Nextstrain initiative<sup>39</sup> and embedded in the data from the GISAID repository. The Nextstrain  
 152 clade definitions are informed by the statistical distribution of genome distances in phylogenetic clusters<sup>41</sup>, followed by the  
 153 merging of smaller lineages into major clades. The latter is based on shared marker variants. The main difference compared to  
 154 our analysis is that the comparison is based on the whole genome sequence, while we only analyse spike proteins. Note that the

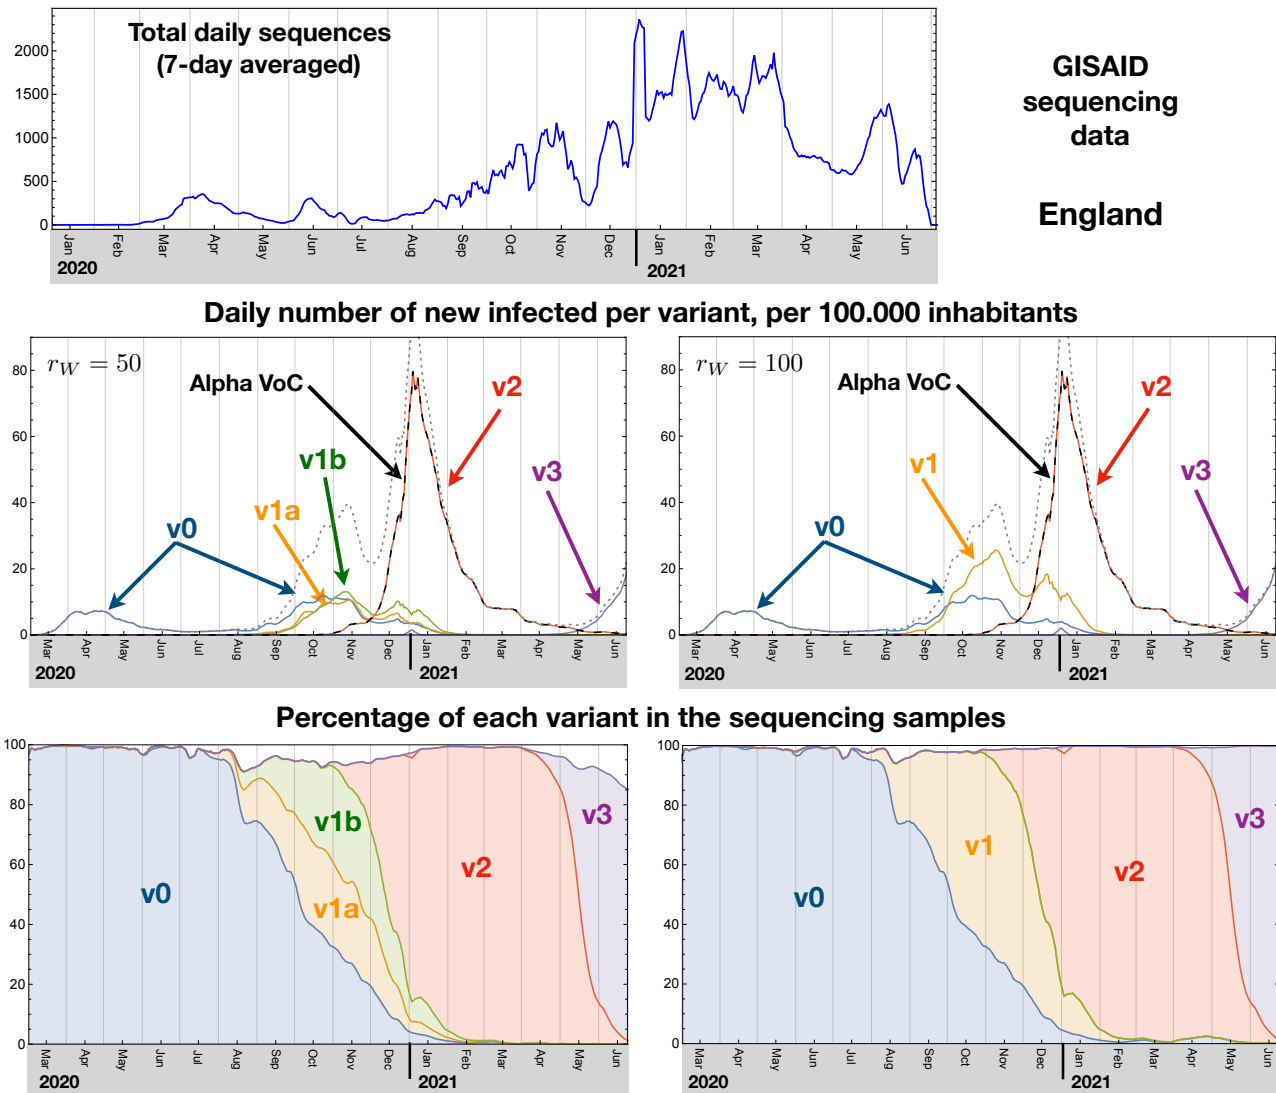

**Figure 2. Machine Learning results.** For England, the top panel shows the time-distribution of the sequences used in this analysis. Below, we present the results of the clustering for two choices of cut: at a Ward distance  $r_W = 50$  (left) and  $r_W = 100$  (right). The middle plots show an estimate of the daily number of new infections per cluster, compared to the ones attributed to the Alpha VoC in the GISAID dataset. In the bottom plots, we show the percentage of sequences in each cluster.

155 marker variants used in the lineage merging contain specific information on proteins, including the spike. It has been noted that  
 156 this way of defining clades provides similar results to the Pango lineage classification<sup>11</sup>, and other variations. For the UK, we  
 157 show in Fig. 3 the frequency and number of infections assigned to each clade, where we note that GRY corresponds broadly to  
 158 the Alpha VoC (or variant v2 in our results). These plots confirm that each wave is dominated by a single group of mutations.  
 159 By comparing the frequencies, we also observe that our variant v1 matches the clade GV, while v0 groups all the other ones  
 160 that mainly occurred during the first wave. We also note that our method allows to clearly identify the Delta VoC (v3), while  
 161 in the Nextstrain clades it is associated with the clade G. This validation demonstrates that the clustering based on the spike  
 162 protein sequences alone is able to identify relevant variants for the SARS-CoV-2.

### 163 Variants as time-ordered cluster chains

164 Having validated our method to define variants in terms of ML clusters, we now turn our attention to study the time evolution  
 165 of the mutations and how new relevant variants emerge from the old ones. To do so, we have divided the sequencing dataset

## Nextstrain clades

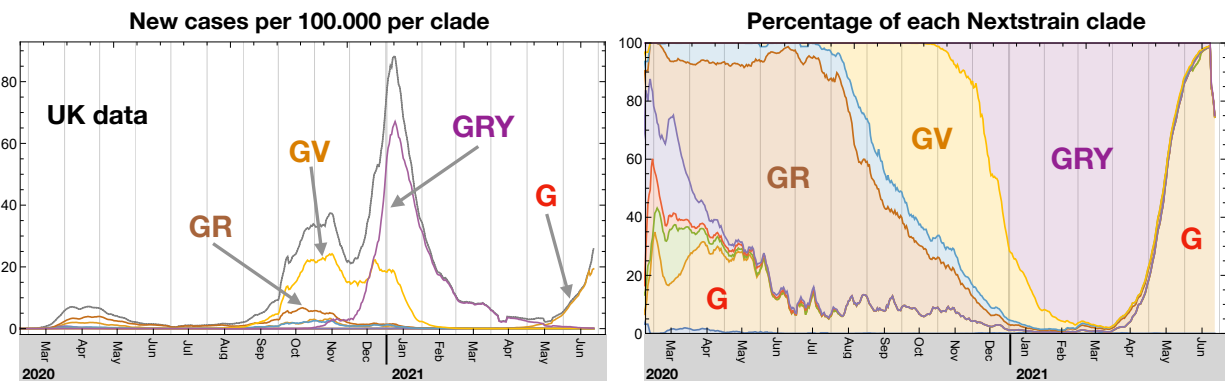

**Figure 3. Nextstrain clades.** Representation of the “clades” as defined by the Nextstrain initiative<sup>39</sup>. In the two panels we show the estimate of the number of infected by each clade (left) and the percentage in the sequencing data (right) for the UK. We indicate the names of only the major clades. Note that GRY coincides with the Alpha VoC, while the Delta VoC is behind the late dominance of the clade G.

166 for England into months, following the date tag in the GISAID repository. For each month, we run the ML algorithm on the  
167 pruned data to define clusters, retaining only the ones comprising at least 1% of the dataset. Then, we compare the clusters in  
168 consecutive months to link the ones that have high degree of “similarity”: we establish strong links if the most common spike  
169 sequence in the two clusters is exactly the same, and weak links if the strong link fails but the “average distance” between the  
170 two clusters is below a given threshold. More details on this procedure and its validation can be found in the supplementary  
171 material. The linkage algorithm we employ allows to define unique chains of clusters, that we associate to variants. The results  
172 are shown in Fig. 4 for two choices of the Ward distance:  $r_W = 100$  in the left and  $r_W = 200$  in the right plots. Interestingly, as  
173 in Fig. 2, we identify 5 and 4 clusters for the two choices. By comparing the plots of the frequencies and infection numbers,  
174 we see that the cluster chain variants defined here coincide with the ones found in the global analysis in Fig. 2, thus further  
175 validating our method.

176 The chain analysis, however, allows us to better probe the time evolution and emergence of the variants. To do so, for the  
177 clusters at the beginning of each chain, we define a branching link with the cluster in the previous month that is the closest  
178 in terms of the Ward distance. These connections, which do not qualify as weak links, are shown in grey in the top plots in  
179 Fig. 4. From the case  $r_W = 200$ , we clearly see that v1, which is responsible for the second wave, branched off from v0 in  
180 October. Similarly, v2, which corresponds to the Alpha VoC, also branched off from v0 a month later. The Delta VoC v3,  
181 instead, branched off from v1 in April, at the time when the links defining the chain turn from strong to weak. The three-node  
182 chain appearing in June corresponds to a short lived variant that appeared just after the end of the first wave, but was not able to  
183 ignite a new wave. By lowering the cut that defined clusters, see left plots in Fig. 4, one can see how v1 splits in two distinct,  
184 but closely related, chains. The Delta VoC v3 is now seen as branching off from v1b.

185 These results firstly show that the phylogenetic relation between variants can be recovered by our simple ML algorithm  
186 applied to the spike protein sequences alone. Furthermore, we see a distinctive pattern relating the emergence of a relevant  
187 variant and the exponential increase in infections that ignites a new pandemic wave. A new wave only emerges when a new  
188 variant is generated, which has the virological strength to overcome the old ones. This is seen very clearly with v2 (or Alpha  
189 VoC) which spins off from v0 closely to v1 and takes over by generating a third wave. We also see the emergence of short lived  
190 variants that do not have the power to start a new wave and therefore die off without infecting a sizeable number of individuals.

### 191 **Epidemiological data and MeRG**

192 The results of our ML analysis firmly suggest that there is a strong relation between the genesis of a new relevant variant and the  
193 emergence of a new wave, with exponential increase in the number of infections, in the epidemiological data. In a companion  
194 article<sup>22</sup> we developed a framework that can be used to describe the evolution of each variant. The model is based on the eRG  
195 approach by including mutations (MeRG).

The MeRG framework models the time evolution of the cumulated number of infected by each variant in terms of a logistic

## Monthly ML classification of variant clusters

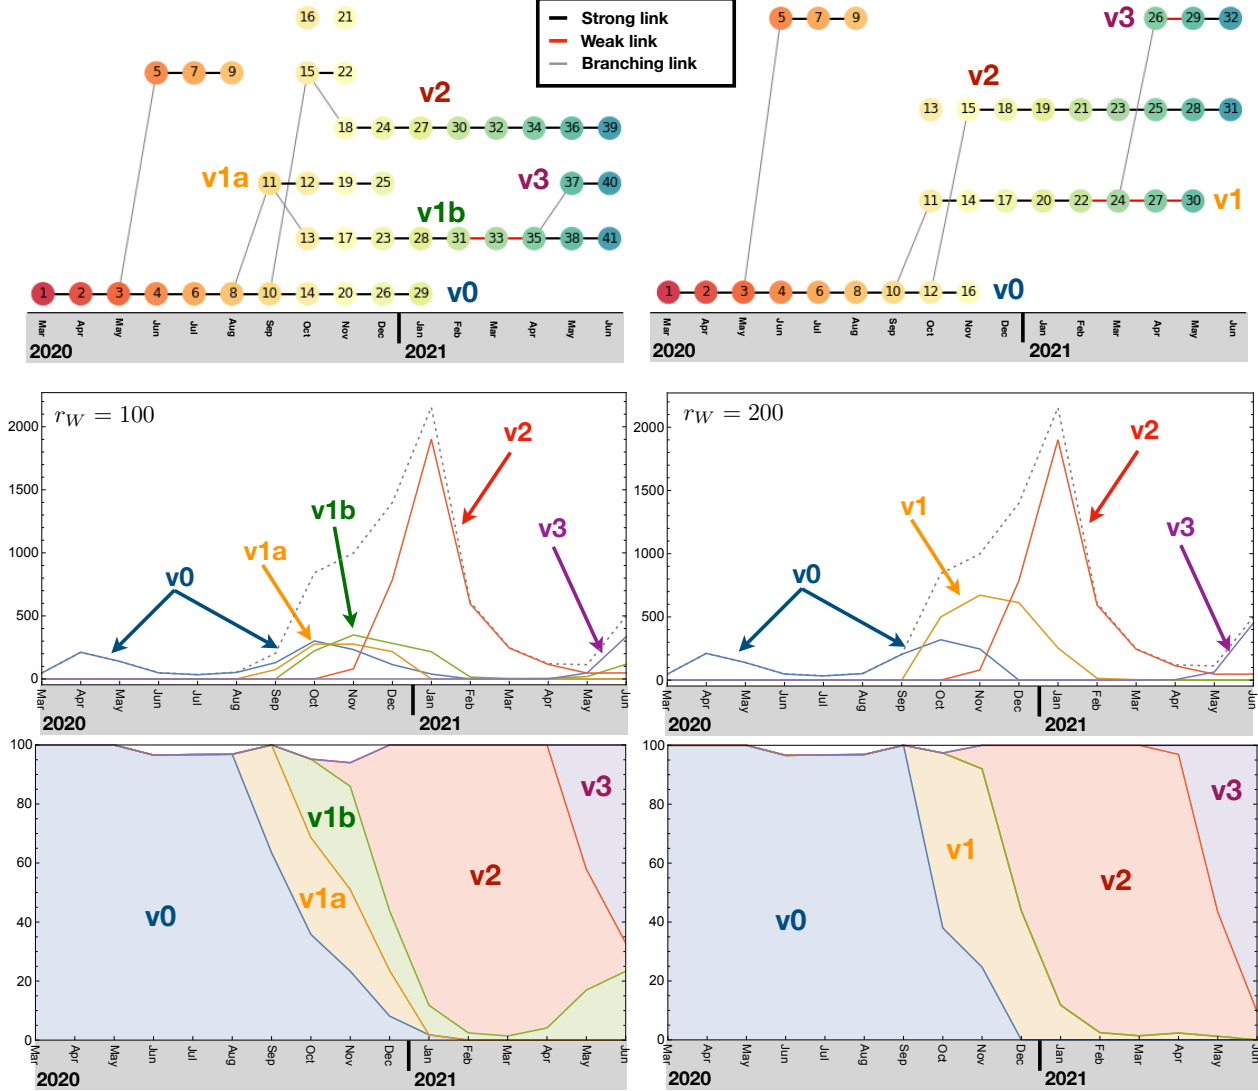

**Figure 4. Monthly ML analysis and chain variants.** The clusters are linked to form chains, which are then identified with relevant variants, as shown in the top plots. In the middle and bottom plots we show the number of daily infected and percentage of occurrence for each variant, similarly to Fig. 2. The left plots correspond to  $r_W = 100$  while the right ones to  $r_W = 200$ . Note that the chains v2 and v3 can be associated to the Alpha and Delta VoC, respectively.

function (sigmoid), solution of the eRG equation, and given by:

$$\mathcal{I}_c(t) = \frac{Ae^{\gamma t}}{B + e^{\gamma t}}, \quad (1)$$

196 where  $\mathcal{I}_c$  is the cumulative number of infected,  $\gamma$  is the infection rate (in inverse days) and  $A$  is the total affected individuals  
 197 after the wave (per 100.000 inhabitants). The parameter  $B$  controls the timing of the wave, and is of no concern in this study.  
 198 We recall that the parameter  $\gamma$  encodes the effective diffusion speed of the variant, including not only its intrinsic viral power  
 199 but also the effect of pharmaceutical measures (like vaccinations) and social distancing measures. Nevertheless, it is possible to  
 200 compare the value of these parameters between different variants. If the diffusion occurs under similar social conditions, this  
 201 represents a measure of the ability of the new variant to spread and infect new individuals.

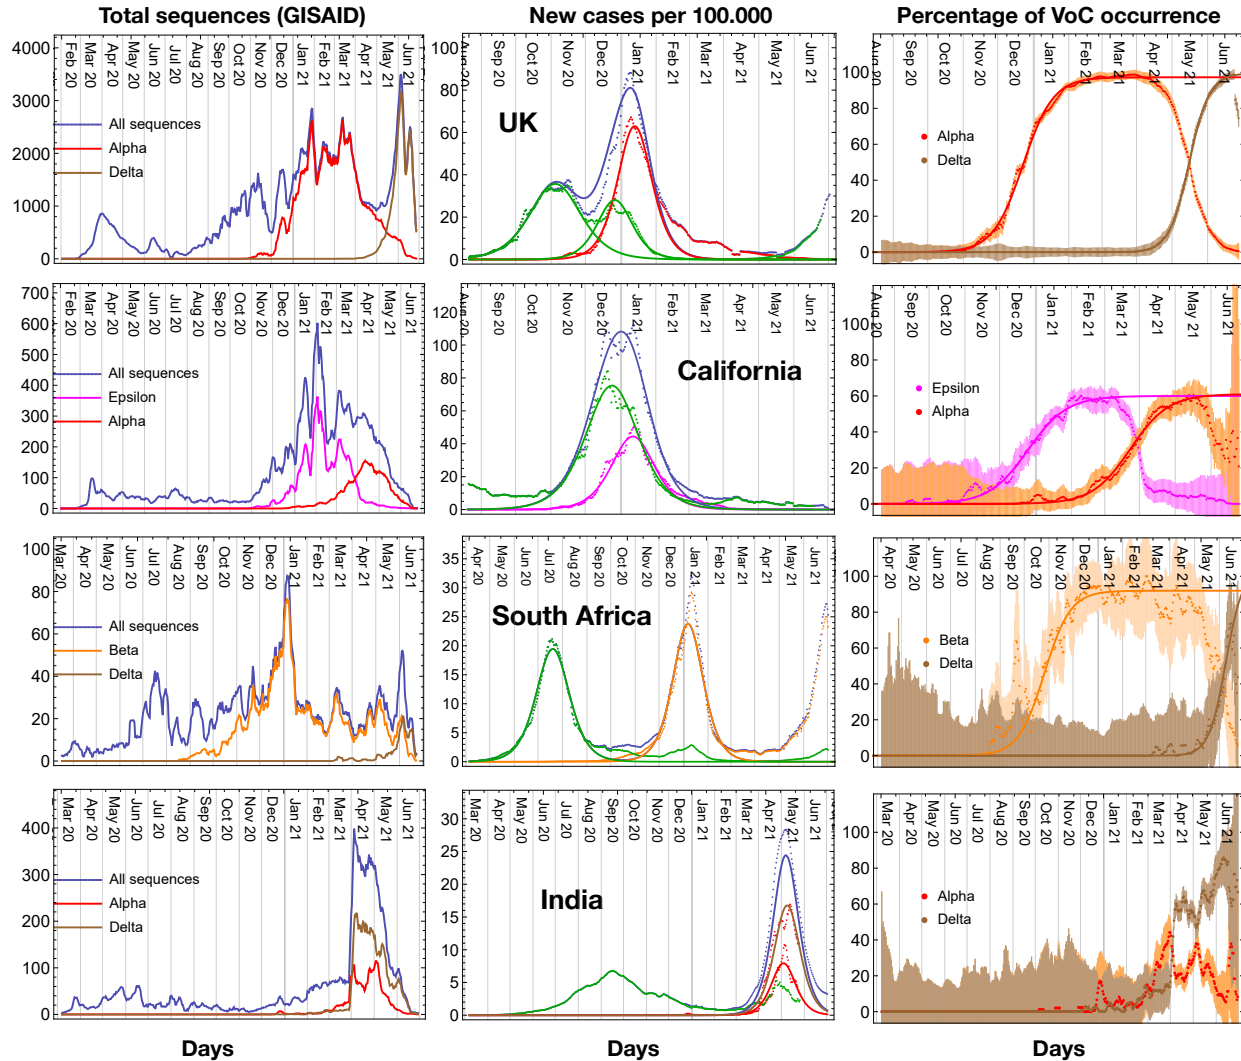

**Figure 5. MeRG model for epidemiological data of variants.** Results of the MeRG fitting of the number of infected associated to each relevant variant. Each row corresponds to a geographical region. In the left column we show the total number of sequencing available on GISAID (in colour the ones associated to the relevant VoC or VoI); the middle column shows the number of new daily infected (per 100.000 inhabitants); the right column shows the percentage of each VoC or VoI in the sequencing data. All plots show daily rates, with data smoothed over a period of 7 days. In the middle plots, the data are shown by dots, where blue corresponds to the total and the colours show the number of infected associated to each variant. The solid lines show the result of the fits to the MeRG model (note that only for the UK we fit the “standard variant” - in green - with two logistic functions). In the left plots, the error derives from the expected statistical variation on the number of daily sequences (after smoothing). For all the plots, the classification in variants derived from the GISAID data.

202 Thus, we used the logistic function above to fit the epidemiological data, after distributing the new daily infected to each  
 203 variant proportionally to the variant frequency observed in the sequencing data. This procedure yields a reliable estimate of the  
 204 diffusion of each variant. For this purpose, we use the full dataset from GISAID for the whole UK, using the VoC classification  
 205 embedded in the data to define the variants. As shown before, this classification is equivalent to the result of our ML approach.  
 206 The result is shown in the top row of Fig. 5, where we show the number of sequences (left plot), the new number of infections  
 207 per variant and the result of the MeRG fit (middle) and the frequency of the VoCs (right). Note that the total numbers are plotted  
 208 in blue, while the VoCs in colours. We considered the epidemiological data from the most recent waves, which developed  
 209 between September 2020 and February 2021. The green curve in the middle plot shows that, after the first peak at the beginning



| Region       | standard variant |           | variant of concern |                |         | transmissibility | VoC percentage |               |
|--------------|------------------|-----------|--------------------|----------------|---------|------------------|----------------|---------------|
|              | A                | $\gamma$  | $A_{VoC}$          | $\gamma_{VoC}$ | VoC/VoI | increase         | $A_{\%}$       | $\gamma_{\%}$ |
| UK           | 2140(12)         | 0.0668(5) | 2530(10)           | 0.0994(7)      | Alpha   | 49%              | 97.3(3)%       | 0.076(1)      |
|              |                  |           | –                  | –              | Delta   | –                | 99(1)%         | 0.115(2)      |
| South Africa | 1104(2)          | 0.0705(4) | 1161(2)            | 0.0904(5)      | Beta    | 28%              | 91.9(8)%       | 0.061(4)      |
|              |                  |           | –                  | –              | Delta   | –                | 96(6)%         | 0.090(7)      |
| India        | 717(3)           | 0.0358(4) | 497.8(8)           | 0.0858(3)      | Alpha   | 140%             | –              | –             |
|              |                  |           | 908(5)             | 0.0747(6)      | Delta   | 109%             | –              | –             |
| California   | 4773(7)          | 0.0620(3) | 2250(5)            | 0.0758(5)      | Epsilon | 22%              | 59.9(6)%       | 0.059(4)      |
|              |                  |           | –                  | –              | Alpha   | –                | 61.0(6)%       | 0.0610(2)     |

**Table 1. MeRG fit parameters.** Parameters from the fit of the VoC/VoI for the UK, South Africa, California and India, also shown in Fig. 5. The fit follows the MeRG model, according to which each variant can be fitted by an independent logistic function. For the UK, the “standard variant” fit corresponds to the first peak, in October-November 2020. The transmissibility increase is computed by comparing the gamma of the VoC with that of the standard variant in the same country. For the new variants that have not reached the peak of diffusion, it is not possible to extract reliable values for the eRG parameters.

210 of November, a second smaller peak developed. We describe the two with two independent sigmoids. The second sigmoid  
 211 is subtracted from the data when fitting for the Alpha VoC data. The parameters from the fit are reported in Table 1. As the  
 212 social conditions during this period did not change substantially, it is meaningful to compare the  $\gamma$  parameters for the Alpha  
 213 and Delta VoC with the other ones (in green). We observed a marked increase in the infectivity, by 49% for Alpha, which is  
 214 compatible with laboratory tests. Interestingly, the frequency percentage for the VoCs, show in the left plot, can also be fitted  
 215 very accurately with a logistic function in Eq. (1) as long as only one VoC dominates. The results are also reported in Table 1.  
 216 The fit parameter  $\gamma_{\%}$  is a measure of how more infectious is the new VoC with respect to the previously dominant one. This plot  
 217 also shows very effectively the switch between the two variants, occurring in May 2021.

218 We repeated the same analysis for South Africa, California and India, which show very good fits notwithstanding the  
 219 more limited sequencing statistics available on GISAID. This is clearly shown in the left plots, where we report the statistical  
 220 uncertainty at 65% confidence level, due to the available sequencing. The results, shown in Fig. 5 and Table 1, demonstrate that  
 221 the MeRG framework provides an excellent modelling of the data.

## 222 Discussion

223 We present a simple Machine Learning algorithm based on the Levenshtein distance that allows us to identify, classify and track  
 224 relevant virus variants without any prior knowledge of their characteristics. While our procedure is based on spike protein  
 225 sequencing only and is not biased by any knowledge of the probability and relevance of each mutation, the results are validated  
 226 by comparison to other informed methods based on the complete genome. We applied the algorithm to the sequencing data for  
 227 England, which offers the largest dataset on the GISAID open-source genome repository. The results show that the relevant  
 228 VoCs (Alpha and Delta, in the case under study) can be clearly identified and isolated. The effectiveness of the algorithm is  
 229 also confirmed by the data from Wales and Scotland, which have more limited numbers of available sequences. Our results  
 230 prove that the method, based on spike protein sequences alone, is as effective as and complementary to other methods used  
 231 in the literature. Furthermore, we designed a procedure to classify variants in terms of time-ordered chains of clusters. As  
 232 a practical application, we applied the algorithm to the England data binned in months, and then defined links between the  
 233 clusters independently determined for each month. This technique also allows us to define a branching link, which reconstructs  
 234 the proximity of the new variants with previous ones. Hence, we establish that the Alpha VoC is closely related to the variant  
 235 that first spread in Europe, while the Delta one stems from the variant that dominated during the second wave in Europe, in  
 236 September-October 2020.

237 We used the relative percentage of each variant in the sequencing dataset to estimate the number of individuals infected  
 238 by each variant. Hence, by correlating the variant definition to epidemiological data, we discover that each new wave of the  
 239 COVID-19 pandemic is driven and dominated by a new emerging variant, as identified by our ML analysis. This observation  
 240 corroborates the hypothesis that there exists a strong and direct causal relation between the emergence of a new variant and of a  
 241 new epidemic wave. We model the number of infected by use of the eRG framework. Each variant can be modelled by an  
 242 independent eRG function, in agreement with an evolutionary theory we proposed in a companion manuscript (MeRG)<sup>22</sup>. We  
 243 also use epidemiological data from the whole UK, California, India and South Africa to confirm the validity of the model.

## 244 Limitations

245 The main limitation of this study is the fact that it is applied only to the sequencing data from a single region, England. This is  
246 justified by the fact that sequencing dataset associated to England on the GISAID open-source genome repository is by far the  
247 largest compared to other countries/regions. Thus, it is the only dataset that allows for reliable classification of the variants. To  
248 validate the results, we have also analysed the data for Wales and Scotland, as presented in the supplementary material. We  
249 chose the other two nations of the Great Britain island because they have a very similar epidemiological history compared to  
250 England, thus we would expect the same results. As such, by comparing the results we would test the reliability of the ML  
251 procedure alone. In fact, the results for Wales and Scotland, while less significant with respect to statistics, show the same  
252 patterns we obtained for England.

## 253 Conclusions

254 The results of our ML analysis are seminal to the development of a new strategy to study how SARS-CoV-2 variants emerge  
255 and to predict the characteristic of future mutations of the spike proteins. Furthermore, the same methodology can be applied to  
256 other viral diseases, like influenza, if sufficient sequencing data is available. Hence, we provided an effective and unbiased  
257 procedure to identify new emerging variants that can be responsible for the onset of a new epidemiological wave. The main  
258 novelty of our approach is that it is based on information about the spike protein alone, thus making the analysis computationally  
259 less intensive than more standard approaches based on the whole genome. Furthermore, no prior knowledge of the variant  
260 characteristics is necessary to obtain reliable results.

261 The results we present here constitute a milestone for the development of a new exploratory strategy of the genesis of  
262 variants for coronaviruses. The time sequence definition of a variant, in fact, allows us to study the branching off of new  
263 relevant variants, and track the changes in the spike protein associated to the same variant over time or to stemming new  
264 variants. Further studies are necessary to fully exploit this information. Furthermore, the same procedure can be applied to  
265 other countries for the COVID-19 pandemic, if sufficiently extensive sequencing datasets are available. We also plan to apply  
266 the same analysis to other viral infectious diseases.

267 Our ML strategy is a new tool that can help preventing and forecasting the emergence of new epidemic waves by offering  
268 a simple and computationally light procedure to identify new relevant variants. Hence, it can be used by decision makers to  
269 define short and long term strategies to curb the current COVID-19 pandemic or future ones.

## 270 Acknowledgements

271 We acknowledge with gratitude the authors, originating and submitting laboratories of the genetic sequence and metadata made  
272 available through GISAID. A full listing of all authors and laboratories is available on the GISAID website.

## 273 Author contributions statement

274 This work has been designed and performed conjointly and equally by all the authors. In particular: AdH, SV, AG and FC have  
275 developed the Machine Learning algorithm and analysed the spike protein sequencing data; CC has collected and analysed the  
276 clade and variant of concern data from GISAID; GC, CC, SH and FS have developed the theoretical framework. All authors  
277 have equally contributed to the writing of the text.

## 278 Additional information

279 The authors declare no competing interests.

## 280 Data and code availability

281 All raw data used in this work are obtained from open-source repositories: [GISAID](https://gisaid.org/) for the sequencing and [Ourworldindata.org](https://ourworldindata.org/)  
282 for the epidemiological data. The Machine Learning code is available at <https://github.com/AdeledeHoffer/ML-Covid>

## 283 References

- 284 1. Taubenberger, J. K. & Morens, D. M. 1918 influenza: The mother of all pandemics. *Rev Biomed* **17**(1), 69–79 (2006).
- 285 2. Sanjuán, R., Nebot, M. R., Chirico, N., Mansky, L. M. & Belshaw, R. Viral mutation rates. *J. Virol.* **84**, 9733–9748, DOI:  
286 [10.1128/JVI.00694-10](https://doi.org/10.1128/JVI.00694-10) (2010). <https://jvi.asm.org/content/84/19/9733.full.pdf>.
- 287 3. Plante, J. A. *et al.* Spike mutation D614G alters SARS-CoV-2 fitness. *Nature* **592**, 116 – 121, DOI: [https://doi.org/10.](https://doi.org/10.1038/s41586-020-2895-3)  
288 [1038/s41586-020-2895-3](https://doi.org/10.1038/s41586-020-2895-3) (2021).

- 289 **4.** Korber, B. *et al.* Tracking changes in SARS-CoV-2 spike: Evidence that D614G increases infectivity of the COVID-19  
290 virus. *Cell* **182**, 812–827.e19, DOI: <https://doi.org/10.1016/j.cell.2020.06.043> (2020).
- 291 **5.** Rambaud, A. *et al.* Preliminary genomic characterisation of an emergent SARS-CoV-2 lineage in the UK defined by a  
292 novel set of spike mutations. *COVID-19 Genomics Consortium UK (CoG-UK) Rep.* (2020).
- 293 **6.** Mahase, E. COVID-19: What have we learnt about the new variant in the UK? *BMJ* **371**, DOI: [10.1136/bmj.m4944](https://doi.org/10.1136/bmj.m4944)  
294 (2020). <https://www.bmj.com/content/371/bmj.m4944.full.pdf>.
- 295 **7.** Tegally, H. *et al.* Emergence and rapid spread of a new severe acute respiratory syndrome-related coronavirus 2 (SARS-  
296 CoV-2) lineage with multiple spike mutations in South Africa. *medRxiv* DOI: [10.1101/2020.12.21.20248640](https://doi.org/10.1101/2020.12.21.20248640) (2020).  
297 <https://www.medrxiv.org/content/early/2020/12/22/2020.12.21.20248640.full.pdf>.
- 298 **8.** Sabino, E. C. *et al.* Resurgence of COVID-19 in Manaus, Brazil, despite high seroprevalence. *The Lancet* **397**, 452–455,  
299 DOI: [https://doi.org/10.1016/S0140-6736\(21\)00183-5](https://doi.org/10.1016/S0140-6736(21)00183-5) (2021).
- 300 **9.** Pater, A. A. *et al.* Emergence and evolution of a prevalent new SARS-CoV-2 variant in the United States. *bioRxiv* DOI:  
301 [10.1101/2021.01.11.426287](https://doi.org/10.1101/2021.01.11.426287) (2021). <https://www.biorxiv.org/content/early/2021/01/19/2021.01.11.426287.full.pdf>.
- 302 **10.** Konings, F. *et al.* SARS-CoV-2 variants of interest and concern naming scheme conducive for global discourse. *Nat.*  
303 *Microbiology* **6**, 821–823, DOI: <https://doi.org/10.1038/s41564-021-00932-w> (2021).
- 304 **11.** Rambaut, A. *et al.* A dynamic nomenclature proposal for SARS-CoV-2 lineages to assist genomic epidemiology. *Nat.*  
305 *Microbiol.* **5**, 1403–1407, DOI: [10.1093/nsr/nwaa036](https://doi.org/10.1093/nsr/nwaa036)<https://doi.org/10.1038/s41564-020-0770-5> (2020).
- 306 **12.** Elbe, S. & Buckland-Merret, G. Data, disease and diplomacy: GISAID’s innovative contribution to global health. *Glob.*  
307 *Challenges* **1**, 33–46, DOI: <https://doi.org/10.1002/gch2.1018> (2017).
- 308 **13.** Shu, Y. & McCauley, J. GISAID: Global initiative on sharing all influenza data – from vision to reality. *EuroSurveillance*  
309 **22** (13), DOI: <https://doi.org/10.2807/1560-7917.ES.2017.22.13.30494> (2017).
- 310 **14.** Volz, E. *et al.* Transmission of SARS-CoV-2 lineage B.1.1.7 in England: Insights from linking epidemiological and genetic  
311 data. *medRxiv* DOI: [10.1101/2020.12.30.20249034](https://doi.org/10.1101/2020.12.30.20249034) (2021). [https://www.medrxiv.org/content/early/2021/01/04/2020.12.30.](https://www.medrxiv.org/content/early/2021/01/04/2020.12.30.20249034.1.full.pdf)  
312 [20249034.1.full.pdf](https://www.medrxiv.org/content/early/2021/01/04/2020.12.30.20249034.1.full.pdf).
- 313 **15.** Kermack, W. O., McKendrick, A. & Walker, G. T. A contribution to the mathematical theory of epidemics. *Proc. Royal*  
314 *Soc. A* **115**, 700–721, DOI: <https://doi.org/10.1098/rspa.1927.0118> (1927).
- 315 **16.** Perc, M. *et al.* Statistical physics of human cooperation. *Phys. Reports* **687**, 1 – 51, DOI: [https://doi.org/10.1016/j.physrep.](https://doi.org/10.1016/j.physrep.2017.05.004)  
316 [2017.05.004](https://doi.org/10.1016/j.physrep.2017.05.004) (2017).
- 317 **17.** Wang, Z., Andrews, M. A., Wu, Z.-X., Wang, L. & Bauch, C. T. Coupled disease–behavior dynamics on complex networks:  
318 A review. *Phys. Life Rev.* **15**, 1 – 29, DOI: <https://doi.org/10.1016/j.plrev.2015.07.006> (2015).
- 319 **18.** Giordano, G. *et al.* Modeling vaccination rollouts, SARS-CoV-2 variants and the requirement for non-pharmaceutical  
320 interventions in Italy. *Nat. Medicine* DOI: <https://doi.org/10.1038/s41591-021-01334-5> (2021).
- 321 **19.** Della Morte, M., Orlando, D. & Sannino, F. Renormalization Group Approach to Pandemics: The COVID-19 Case. *Front.*  
322 *Phys.* **8**, 144, DOI: <https://doi.org/10.3389/fphy.2020.00144> (2020).
- 323 **20.** Cacciapaglia, G. & Sannino, F. Interplay of social distancing and border restrictions for pandemics (COVID-19) via  
324 the epidemic Renormalisation Group framework. *Sci Rep* **10**, 15828, DOI: <https://doi.org/10.1038/s41598-020-72175-4>  
325 (2020). [2005.04956](https://doi.org/10.1038/s41598-020-72175-4).
- 326 **21.** Cacciapaglia, G., Cot, C. & Sannino, F. Second wave COVID-19 pandemics in Europe: A temporal playbook. *Sci Rep* **10**,  
327 15514, DOI: <https://doi.org/10.1038/s41598-020-72611-5> (2020). [2007.13100](https://doi.org/10.1038/s41598-020-72611-5).
- 328 **22.** Cacciapaglia, G. *et al.* Epidemiological theory of virus variants (2021). [2106.14982](https://doi.org/10.1038/s41598-021-01334-5).
- 329 **23.** Levenshtein, V. I. Binary codes capable of correcting deletions, insertions, and reversals. *Doklady Akademii Nauk* **163**,  
330 845–848 (1965).
- 331 **24.** Levenshtein, V. I. Binary codes capable of correcting deletions, insertions, and reversals. *Cybern. Control. Theory* **10**,  
332 707–710 (1966).
- 333 **25.** Berger, B., Waterman, M. S. & Yu, Y. W. Levenshtein distance, sequence comparison and biological database search.  
334 *IEEE Transactions on Inf. Theory* 1–1, DOI: <https://doi.org/10.1109/TIT.2020.2996543> (2020).
- 335 **26.** Koumakis, L. Deep learning models in genomics; are we there yet? *Comput. Struct. Biotechnol. J.* **18**, 1466–1473, DOI:  
336 <https://doi.org/10.1016/j.csbj.2020.06.017> (2020).

- 337 **27.** Kopp, W., Monti, R., Tamburini, A., Ohler, U. & Akalin, A. Deep learning for genomics using Janggu. *Nat. Commun.* **11**,  
338 3488, DOI: <https://doi.org/10.1038/s41467-020-17155-y> (2020).
- 339 **28.** Yang, A. *et al.* Review on the application of machine learning algorithms in the sequence data mining of DNA. *Front.*  
340 *Bioeng. Biotechnol.* **8**, 1032, DOI: <https://doi.org/10.3389/fbioe.2020.01032> (2020).
- 341 **29.** Altschul, S., Gish, W., Miller, W., Myers, E. & Lipman, D. Basic local alignment search tool. *J. Mol. Biol.* **215**, 403–410  
342 (1990).
- 343 **30.** Li, H. & Durbin, R. Fast and accurate long-read alignment with Burrows-Wheeler transform. *Bioinformatics* **26**, 589–595  
344 (2010).
- 345 **31.** Langmead, B. & Salzberg, S. Fast gapped-read alignment with Bowtie 2. *Nat. Methods* **9**, 357 (2012).
- 346 **32.** Wilson, K. G. Renormalization group and critical phenomena. 1. Renormalization group and the Kadanoff scaling picture.  
347 *Phys. Rev. B* **4**, 3174–3183, DOI: <https://doi.org/10.1103/PhysRevB.4.3174> (1971).
- 348 **33.** Wilson, K. G. Renormalization group and critical phenomena. 2. Phase space cell analysis of critical behavior. *Phys. Rev.*  
349 *B* **4**, 3184–3205, DOI: <https://doi.org/10.1103/PhysRevB.4.3184> (1971).
- 350 **34.** Cacciapaglia, G., Cot, C., Islind, A. S., Óskarsdóttir, M. & Sannino, F. Impact of US vaccination strategy on COVID-19  
351 wave dynamics. *Sci. Reports* (2021). [2021.12004](https://doi.org/10.1038/s41598-021-12004-4).
- 352 **35.** Della Morte, M. & Sannino, F. Renormalization group approach to pandemics as a time-dependent SIR model. *Front.*  
353 *Phys.* **8**, DOI: [10.3389/fphy.2020.591876](https://doi.org/10.3389/fphy.2020.591876) (2021).
- 354 **36.** Cacciapaglia, G. *et al.* The field theoretical ABC of epidemic dynamics (2021). [2101.11399](https://doi.org/10.1101/2021.11.1399).
- 355 **37.** Cacciapaglia, G., Cot, C. & Sannino, F. Multiwave pandemic dynamics explained: How to tame the next wave of infectious  
356 diseases. *Sci. Reports* **11**, 6638 (2021). [2011.12846](https://doi.org/10.1038/s41598-021-12846-4).
- 357 **38.** Cacciapaglia, G. & Sannino, F. Evidence for complex fixed points in pandemic data. *Front. Appl. Math. Stat.* **7**, 659580,  
358 DOI: <https://doi.org/10.3389/fams.2021.659580> (2021). [2009.08861](https://doi.org/10.1101/2021.08.08.20090886).
- 359 **39.** Hadfield, J. *et al.* Nextstrain: real-time tracking of pathogen evolution. *Bioinformatics* **34**, 4121–4123, DOI: [10.1093/](https://doi.org/10.1093/bioinformatics/bty407)  
360 [bioinformatics/bty407](https://doi.org/10.1093/bioinformatics/bty407) (2018). <https://academic.oup.com/bioinformatics/article-pdf/34/23/4121/26676762/bty407.pdf>.
- 361 **40.** Tang, X. *et al.* On the origin and continuing evolution of SARS-CoV-2. *Natl. Sci. Rev.* **7**, 1012–1023, DOI: [https://](https://doi.org/10.1093/nsr/nwaa036)  
362 [doi.org/10.1093/nsr/nwaa036](https://doi.org/10.1093/nsr/nwaa036) (2020). <https://academic.oup.com/nsr/article-pdf/7/6/1012/33408507/nwaa036.pdf>.
- 363 **41.** Han, A. X., Parker, E., Scholer, F., Maurer-Stroh, S. & Russell, C. A. Phylogenetic Clustering by Linear Integer  
364 Programming (PhyCLIP). *Mol. Biol. Evol.* **36**, 1580–1595, DOI: <https://doi.org/10.1093/molbev/msz053> (2019). <https://academic.oup.com/mbe/article-pdf/36/7/1580/28833695/msz053.pdf>.
- 365 **42.** Cacciapaglia, G., Cot, C. & Sannino, F. Mining Google and Apple mobility data: Temporal anatomy for COVID-19 social  
366 distancing. *Sci Rep* **11**, 4150, DOI: <https://doi.org/10.1038/s41598-021-83441-4> (2020). [2008.02117](https://doi.org/10.1101/2020.08.02.21117).
- 367

# Supplementary material

368

## 369 S1 Theoretical modelling of variant diffusion

370 The current paper deals with the time evolution and spread of different variants of SARS-CoV-2 in a given population. A  
371 theoretical study of the underlying processes in the framework of the epidemic Renormalisation Group (eRG) approach<sup>19</sup> has  
372 recently been presented in a companion paper<sup>22</sup>. In this section, we shall briefly review the relevant formalism.

373 The eRG approach is inspired by the running of fundamental couplings as a function of the energy scale in particle physics.  
374 Originally proposed<sup>19</sup> as an effective description of epidemic diffusion processes organised around time-scale invariances,  
375 it has been extended to account for geographic mobility across different countries<sup>20</sup>, the multi-wave structure of the SARS-  
376 CoV-2 pandemic<sup>38</sup> as well as the impact of the US vaccination campaign<sup>34</sup>. The predictive power of this approach has been  
377 demonstrated by accurately describing the impact of non-pharmaceutical interventions<sup>38,42</sup> and predicting the starting date of  
378 the second wave in the fall of 2020 in Europe<sup>21</sup>. An interpretation of the eRG approach as a time-dependent SIR model has also  
379 been discussed<sup>35</sup>, while the relation to other epidemiological approaches has been discussed at great depth in this review<sup>36</sup>.

In the companion paper<sup>22</sup>, the eRG framework has been further extended to describe the time evolution of two different  
variants of a disease. An epidemic coupling strength  $\alpha_i(I_{c,i})$  is introduced for each variant (here  $i = 1, \dots, n$  labels the  $n$  different  
variants). The latter is a function of the cumulative number of individuals  $I_{c,i}$  that have been infected by this  $i$ th variant. The  
time evolution of the different variants is then described by a set of  $\beta$ -functions

$$-\beta_i(I_{c,i}) = \frac{d\alpha_i}{dt}, \quad \forall i = 1, \dots, n, \quad (\text{E1})$$

which constitute the core of the Mutation eRG (MeRG) approach. Inspired by the numerical study of a compartmental model  
and empirically validated by comparing with data from California, the United Kingdom and South Africa, the  $\beta$ -functions were  
written in the form of gradient equations<sup>22</sup> (in detail for the case  $n = 2$ )

$$-\beta_i(I_{c,i}) = \nabla_i \Phi(I_{c,j}), \quad \text{with} \quad \nabla_i = \frac{\partial}{\partial I_{c,i}} \quad (\text{E2})$$
$$\Phi(I_{c,j}) = \sum_{k=1}^n I_{c,k}^2 \frac{\gamma_k}{2} \left( 1 - \frac{2I_{c,k}}{3A_k} \right).$$

Here,  $\gamma_k$  is a measure for the infection rate and  $A_k$  is the asymptotic number of individuals infected by variant  $k$ . Solutions  
of the  $\beta$ -functions (E2) give cumulative numbers of infected individuals as functions of time for each variant that follow a  
logistics function

$$I_{c,i}(t) = \frac{A_i}{1 + e^{-\gamma_i(t - \kappa_i)}}, \quad (\text{E3})$$

380 where  $\kappa_i$  is a parameter that governs the time of appearance of the variant. For given  $i$ , the function  $\beta_i$  in (E2) has two zeroes,  
381 namely  $I_{c,i} = 0$  and  $I_{c,i} = A_i$ , corresponding to the complete absence of the variant  $i$  or the eradication of the latter, in the sense  
382 that there are no more infectious individuals left carrying it. The complete set of  $\beta$ -functions ( $\beta_1, \dots, \beta_n$ ) has  $2^n$  fixed points  
383 and the epidemic is described by the flow equations connecting (some of) them.

## 384 S2 Machine Learning algorithm

385 We employ a Machine Learning algorithm based on the Levenshtein distance between spike protein sequencing. The procedure  
386 can be grossly divided into three steps, which we describe in detail below. All the python codes are provided (see link in  
387 the main publication), with reference to the main libraries provided in this material. While in this work we mainly focus on  
388 England, due to the larger dataset, and other nations of Great Britain, the ML codes can be run on any dataset, for different  
389 countries or regions of the world.

### 390 S2.1 Extraction and pruning of the raw data

391 The raw data are downloaded from the [GISAID](https://gisaid.org/) open-source repository (registration required) in the form of “fasta” files, which  
392 contain information on samples from COVID-19 infected cases. The files contain the full genome, including the spike protein  
393 sequences, but also the date when the sample was taken, the laboratory where it was analysed and the geographic information  
394 about the country or region of origin of the sample. This additional information allows to separate datasets based on a specific  
395 geographical origin, and sample them in time.

396 In this work, we focus only on the spike protein sequences. The data contains sequences with un-identified amino-acids  
397 (labelled with an X) and sequences with missing pieces (thus, with unusual lengths). The spike protein of the early SARS-CoV-2

398 sequences have 1271 amino-acids. Hence, to remove data with missing pieces, we only keep sequences with at least 1250  
399 amino-acids. Furthermore, we dismiss all sequences containing at least one X in the sequence. This pruning allows us to work  
400 only on a high purity dataset. The number of sequences before and after the pruning for England, Wales and Scotland are listed  
401 in Table T1. After the pruning, a significant number of sequences are in the dataset, many of which contain the same sequences  
402 for the spike protein. To accelerate the next step in the analysis, it is convenient to remove repetitions and thus only work on a  
403 dataset containing only different sequences (see right column in Table T1). In particular, this is necessary when we do a global  
404 analysis of the whole dataset, while the time-sampling automatically reduces the number of sequences in the dataset.

|          | Raw sequences | After pruning | Different sequences (after pruning) |
|----------|---------------|---------------|-------------------------------------|
| England  | 436.073       | 329.384       | 9.480                               |
| Wales    | 36.423        | 24.761        | 1.101                               |
| Scotland | 56.950        | 42.302        | 1.514                               |

**Table T1.** Number of sequences in the datasets for England, Wales and Scotland before and after the pruning and selection.

405 The extraction and pruning of the data is done by the python program `extraction_country.py`, where the name of  
406 the country or region needs to be specified in the first lines of the program. The output is as follows:

- 407 • The list of the strictly different sequences as a text file `country_seq_ass.txt`.
- 408 • A csv table `country.csv` where lines correspond to selected sequences. The first column contains the date, the second  
409 the corresponding sequence in reference to the text file already saved and finally a column labelling the VoC or VoI the  
410 sequence belongs to, according to GISAID.
- 411 • A list of the different labs contributing to the sequencing.

412 Note, in passing, that the pruning could be by-passed by modifying the distance calculation in such a way that the presence  
413 of incomplete sequences is properly taken into account. This would require a more complex and optimised procedure. For our  
414 purposes, we wanted to remain as unbiased as possible, thus we opted for the pruning and decided to work with a dataset of the  
415 highest purity.

## 416 S2.2 Computation of the distance matrix

417 The output of the previous step is a list of strictly different spike protein sequences, with a record of their multiplicity in the  
418 dataset under study. At this stage, we need to compute the Levenshtein distances between them. This computation yields a  
419 symmetric matrix with zeros on the diagonal, such that only a triangular matrix needs to be computed on the data.

420 To efficiently compute the Levenshtein distances, we use the library `polyleven`. For this purpose, we created the python code  
421 `Launch_distance.py`, where a specific country or region has to be specified at the beginning of the file. The program calls  
422 `distance.sh` and `distance.py`, thus the process is multicore and very fast. The various lines of the upper triangular  
423 matrix are saved in the subfolder `create` as separate binary files. Launching now `concatenation.py` will load them all  
424 and save a single file containing the complete distance matrix, while the temporary files are deleted.

425 Note that to speed up the computation of the distances, we only considered strictly different spike protein sequences. This  
426 avoids repeated computations. Yet, the construction of the proximity tree, which will be the task of the next step, may depend on  
427 the multiplicity of each sequence in the starting dataset, as we will see. Hence, the program `concatenation.py` outputs two  
428 different distance matrices: `country.bin` where only strictly different sequences are included, and `country_complete.bin`  
429 where the multiplicity of the sequences are taken into account by copying multiple times the corresponding lines in the table.  
430 Thus, the latter contains a much bigger distance matrix than the former.

## 431 S2.3 The proximity tree

432 To create the proximity tree, various libraries are at our disposal. We chose to adopt the hierarchical clustering algorithm from  
433 the `scipy` library as it is easy to work with and adaptable. The only needed input is the distance matrix. For the algorithm,  
434 each initial sequence, i.e. a line or column of the distance matrix, is a *leaf*. The library then groups the leaves into *branches*  
435 based on the Levenshtein distance between them, as specified in the input file. To calculate the effective distance between  
436 branches, various methods are available, and they need to be selected. We anticipate that some methods are not sensitive to the  
437 multiplicity the identical leaves (which have distance zero among them), while others are.

438 The algorithm constructs the proximity tree starting from the leaves: hence, for a sample with  $n$  leaves (i.e. a  $n \times n$  distance  
439 matrix as input), the code considers an initial state with  $n$  branches containing a single leaf each. Hence, the steps consist in  
440 regrouping 2 branches together forming a new branch. Naturally, there can be at most  $n - 1$  of those steps. At any step, the two

441 branches that are chosen to be regrouped (let us call them  $A$  and  $B$ ) are the ones that have the smallest distance between them.  
442 Such distance  $\text{dis}(A, B)$  is computed in terms of the Levenshtein distance  $d(x, y)$  between leaves on the two branches ( $x$  and  
443  $y$  being a leaf from  $A$  and  $B$  respectively). Here is where different methods to compute the branch distance  $\text{dis}(A, B)$  can be  
444 employed. The most common choices are:

- Single Linkage Clustering, where

$$\text{dis}(A, B) = \min_{x \in A, y \in B} d(x, y). \quad (\text{E4})$$

445 This method is insensitive to the multiplicity of identical leaves, thus one can use the file `country.bin` as input.

- Complete Linkage Clustering, where

$$\text{dis}(A, B) = \max_{x \in A, y \in B} d(x, y). \quad (\text{E5})$$

446 As before, this is independent on the leaf multiplicity.

- Unweighted Average Linkage Clustering, where

$$\text{dis}(A, B) = \frac{1}{|A||B|} \sum_{x \in A, y \in B} d(x, y), \quad (\text{E6})$$

447 where  $|X|$  is the number of leaves in the branch  $X$ . This method is sensitive to the multiplicity of identical leaves, thus is  
448 requires `country_complete.bin` as input.

- Ward's Method, an agglomerative clustering method based on the measure of the average squared distance of points in the cluster to its centre of gravity, or centroid. Hence, the effective distance between two branches is defined by the increase in the above measure in the merged cluster with respect to the two separate ones. In practice:

$$\text{dis}(A, B) = \frac{|A||B|}{|A| + |B|} \left[ \sum_{x \in A, y \in B} \frac{d(x, y)^2}{|A||B|} - \sum_{x, x' \in A} \frac{d(x, x')^2}{2|A|^2} - \sum_{y, y' \in B} \frac{d(y, y')^2}{2|B|^2} \right]. \quad (\text{E7})$$

449 This method is sensitive to the multiplicity of identical leaves, thus it requires `country_complete.bin` as input.  
450 Note that we also used this method on the distance matrix `country.bin` to speed up the computation.

451 At each step, the algorithm joins branches together, until all leaves are grouped together. This approach can be schematically  
452 represented by a dendrogram tree, as shown in Fig. F1. This step is executed by the program `linkage.py`. In order to define  
453 clusters and variants, we need to define a threshold in the effective distance, which will therefore be equivalent to a horizontal  
454 cut of the tree branches. In practice, all clusters whose effective distance is larger than the threshold are used to define the  
455 variants. The value of the threshold needs to be determined each time, as it crucially depends on the measure that is employed,  
456 and on the samples. Once the threshold is fixed, the clusters and their time evolution can be obtained. This is done by the  
457 executable called `time.py`.

### 458 S3 Linkage Analysis

459 Data from GISAID repository has been grouped on a monthly basis for the England, Wales and Scotland datasets, as shown  
460 in Table T2. Despite the rather large number of monthly recorded data, we found sequences with high replica rate, thus the  
461 percentage of different sequences over the whole dataset is also reported in the Table T2 and shown by the orange line in  
462 Fig. F2. It has been noted that the most frequent sequence always represents a remarkable amount of the whole dataset, as  
463 shown by the blue line in Fig. F2 for the England dataset. Furthermore, the Levenshtein distance between the most frequent  
464 sequences in two consecutive months is always equal to 0 (i.e., the same sequence is dominant) with the exception of months 9  
465 and 11. This last month clearly represents the overtaking of the Alpha VoC B.1.1.7 over the previous ones. For each month the  
466 same hierarchical clustering algorithm described above based on the Levenshtein measure (LM) has been applied. Here the two  
467 main parameters to take in account are the clustering threshold (Ward distance) that mainly acts on the size of the clusters and  
468 the cut on the minimum amount of data that is needed to define a cluster. Detailed studies have been made to find the right trade  
469 off between the number of clusters and the coverage of the dataset.

470 We define the threshold based on the Ward distance,  $r_W$ , as defined in the previous section. The coverage cut-off is defined  
471 in terms of a minimum percentage of the whole sequence dataset (per month) that is covered by each branch above threshold.

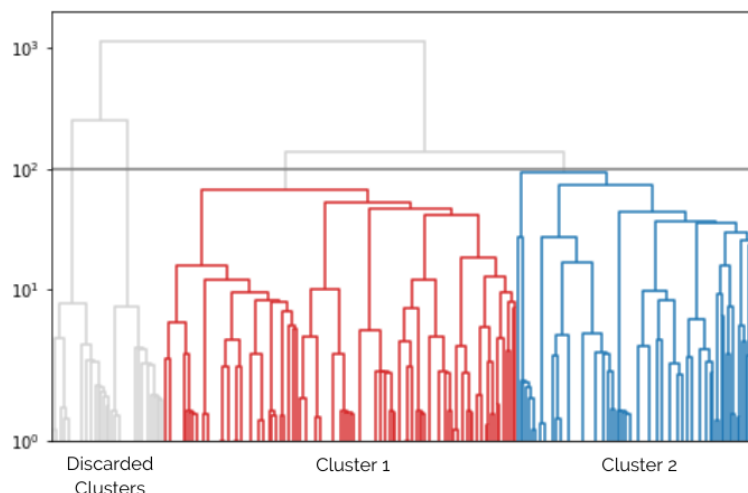

**Figure F1.** Dendrogram three for the England dataset, for month 9 (September 2020), built using the Ward's method. On the y-axis we show the effective distance between two clusters at the point when they merge. The branches in colour represent more than 1% of the total number of sequences for a cut at Ward distance 100.

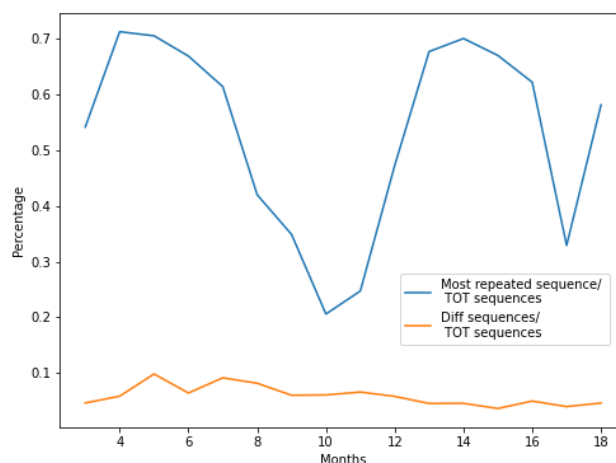

**Figure F2.** Dataset coverage of the most common sequence and different sequences in GISAID (England dataset).

472 Only branches above the cut-off are retained to define clusters. For each given threshold value  $r_W$ , the coverage of the dataset  
 473 decreases while the cut-off value increases, hence increasing the coverage would require pushing the cut-off towards smaller  
 474 values. However, the cut-off choice must take into account the large increase in the number of (small) clusters. The dataset  
 475 coverage and number of clusters as functions of the threshold (Ward distance) are shown in Fig. F3. Quite independently of the  
 476 month, the number of clusters is almost stable for any cut-off in the  $[10^{-2}, 10^{-1}]$  range, while for smaller values it shows a  
 477 linear increase. Thus we choose to set the cut-off value to  $10^{-2}$  to maximise the mean coverage of the dataset (mean coverage  
 478  $> 90\%$ ). Moreover it has been found that the mean coverage is almost stable for any threshold in the range  $[50, 200]$  while the  
 479 number of defined clusters decrease with the threshold value, as shown in Fig. F4. Thus the default working point has been set  
 480 to threshold value of  $r_W = 100$  and a cut-off of  $10^{-2}$ .



| Month | England    | Scotland  | Wales     |
|-------|------------|-----------|-----------|
| 1     | 2 (100%)   | 0         | 0         |
| 2     | 64 (9%)    | 0         | 1 (100%)  |
| 3     | 3944 (5%)  | 1109 (5%) | 965 (5%)  |
| 4     | 7335 (6%)  | 1923 (6%) | 2178 (5%) |
| 5     | 2204 (10%) | 306 (12%) | 866 (7%)  |
| 6     | 5079 (6%)  | 58 (24%)  | 425 (7%)  |
| 7     | 2026 (9%)  | 67 (9%)   | 102 (11%) |
| 8     | 4429 (8%)  | 937 (8%)  | 210 (15%) |
| 9     | 9499 (6%)  | 1592 (6%) | 1275 (6%) |
| 10    | 19634 (6%) | 1740 (8%) | 2732 (5%) |
| 11    | 23431 (7%) | 602 (11%) | 2497 (6%) |
| 12    | 25339 (6%) | 1161 (9%) | 3989 (6%) |
| 13    | 46685 (5%) | 2196 (8%) | 3508 (6%) |
| 14    | 39326 (5%) | 4600 (6%) | 2769 (7%) |
| 15    | 49545 (4%) | 9655 (3%) | 1958 (7%) |
| 16    | 24057 (5%) | 4800 (5%) | 689 (12%) |
| 17    | 24335 (4%) | 6263 (3%) | 301 (10%) |
| 18    | 16133 (5%) | 3638 (5%) | 98 (12%)  |

**Table T2.** Number of GISAID recorded sequences from January 2020 (Month 1) to June 2021 (Month 18).

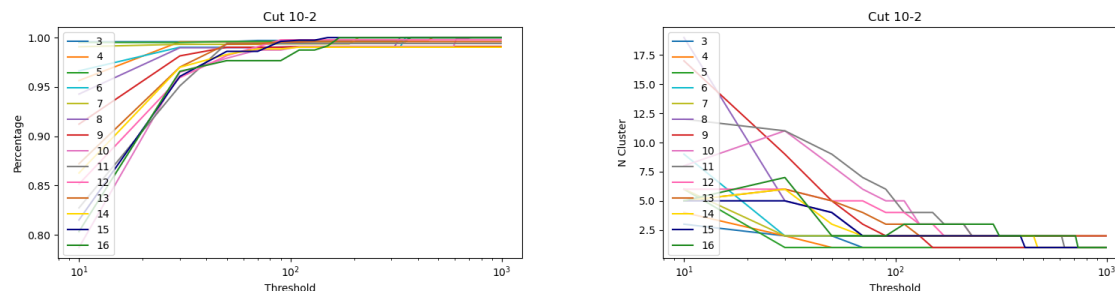

**Figure F3.** Dataset coverage (left) and number of clusters (right) with respect to threshold (Ward distance) value.

### 481 S3.1 Time-series sequences

482 To define and follow the time evolution of a given candidate variant, we build time-series of clusters starting from month 1  
483 using the following algorithm:

- 484 • For each cluster in month  $i$  we selected the most frequent sequence and we tried to find a cluster with the same sequence  
485 in month  $i + 1$  (**strong link**). We iterate to build a path until the procedure fails or the last month is reached.
- 486 • If the strong link association fails but we still have clusters in consecutive months that are free from strong links, we  
487 connected them provided that the distance is less than a given threshold. If two clusters converge to the same node we  
488 keep the nearest one (**soft link**).

489 The threshold cut used for the soft link definition has been optimised looking at the distribution of the distances between  
490 clusters connected with strong links, as shown in Fig. F5. To preserve the topology based on the LM we choose the soft link  
491 threshold as the maximum distance found for a strong link.

492 We define a chain as a list of consecutive clusters connected by strong or weak links as best candidate to study the  
493 evolutionary paths of a candidate variant. For each well defined chain we also assign a branching link taking the first cluster  
494 of the chain and associate it with the cluster in the previous month that is the closest in terms of the Ward distance. In the  
495 following we assign as chain identification number the one of the first cluster in the chain.

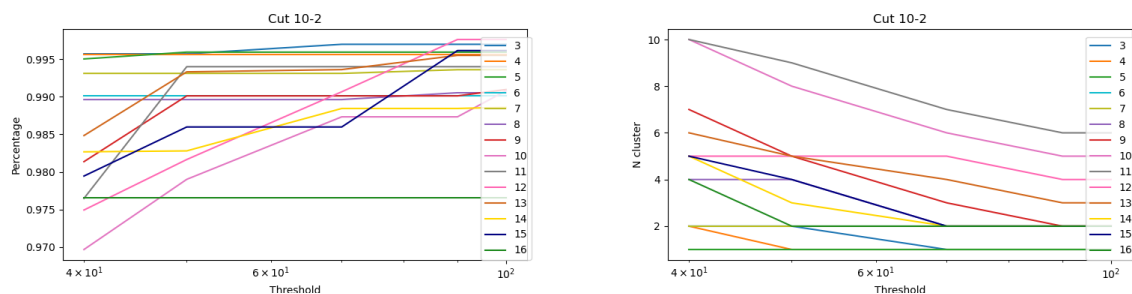

**Figure F4.** Dataset coverage (left) and number of clusters (right) with respect to cluster threshold value

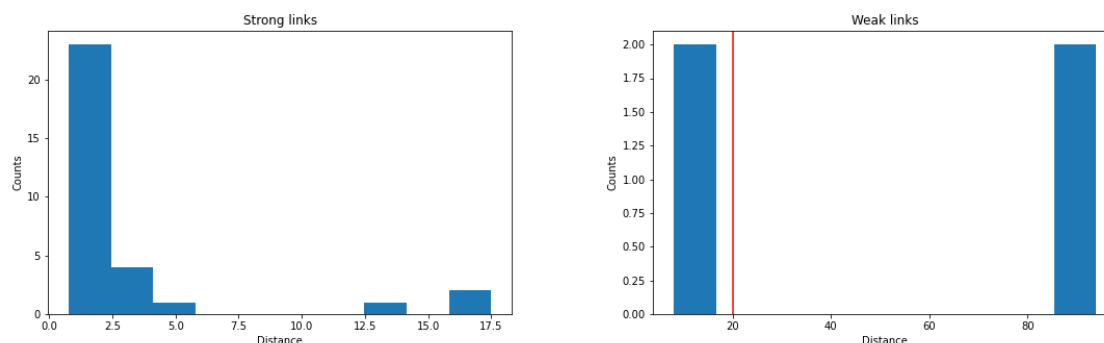

**Figure F5.** Strong link (left) and weak link (right) distances.

### 496 S3.2 Results for England, Scotland and Wales

497 Chains (as candidate variants) for England, Wales and Scotland are shown in Fig. 4 (left plots) and F6, for the same threshold  
 498  $r_W = 100$ . For England, chains #1 (v0) and #18 (v2) clearly correspond to the original variant and to the Alpha VoC (B.1.1.7),  
 499 while the chain #37 (v3) matches the Delta VoC.

500 We also found two other relevant chains, namely chain #11 (v1a) and chain #13 (v1b). Using the branching link it is  
 501 possible to track also the evolutionary path of each single variant candidate. The Alpha VoC is clearly connected to the chain  
 502 #1 via cluster #15 (indeed we found about 70 sequences of Alpha VoC in cluster #15). Similarly, the chains #11 and #13 are  
 503 connected to the original strain and it is likely that they appeared before of the Alpha VoC. Similar results have been found  
 504 using Scotland (and Wales) data in Fig. F6, where chain #1 corresponds to the original variant and chain #11 (#11 for Wales  
 505 data) to the Alpha VoC B.1.1.7 and chain #18 (#20 for Wales data) to the Delta VoC B.1.617.2. Results for the variant frequency  
 506 and daily cases are shown in Fig. F7 and F8 for Scotland and Wales data.

507 A comparison of the evolutionary path of the England chains suggests a competitive mechanism between variants. To  
 508 further investigate this we study the spread of a chain using the distance between consecutive clusters, as shown in Fig. F9.  
 509 The original variant and the Alpha VoC show more stable and lower distance values with respect to chains #11 and #13, thus  
 510 suggesting that such variable can be used as an early discriminant between different evolutionary paths of variants. Namely,  
 511 variants that show smaller distances between consecutive clusters appear to be more stable and able to ignite epidemiological  
 512 episodes of exponential increase (waves). A comparison of the evolutionary path for the original variant and the Alpha VoC for  
 513 England, Wales and Scotland is also shown in Fig. F10.

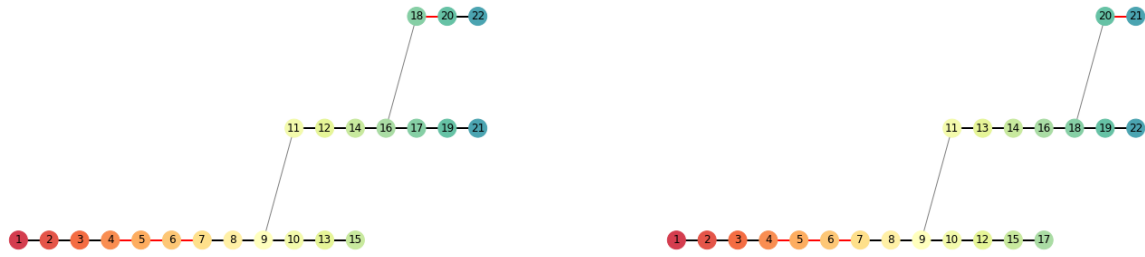

**Figure F6.** Chain results as candidate variants for the Scotland dataset (left) and the Wales one (right). Strong links (black line) and soft link (red line) are reported. Branching links (gray line) where defined are also shown.

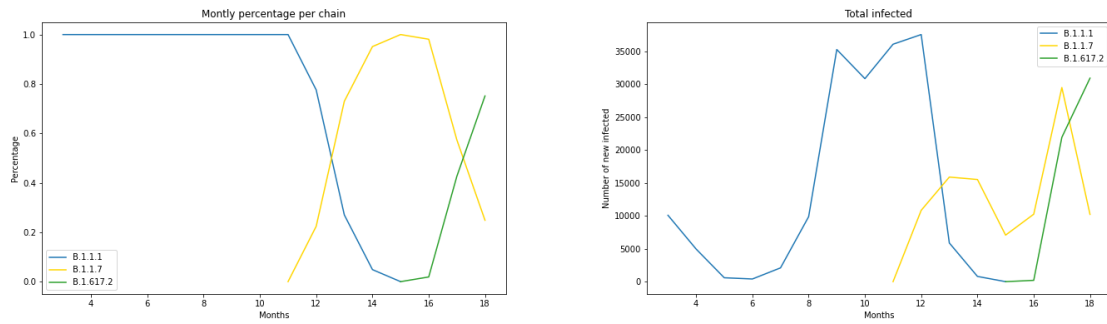

**Figure F7.** Frequency and daily cases for chains as candidate variants (Scotland)

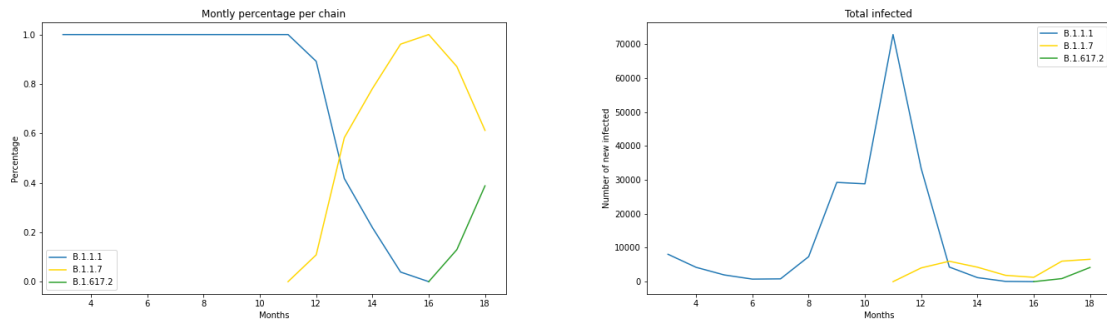

**Figure F8.** Frequency and daily cases for chains as candidate variants (Wales)

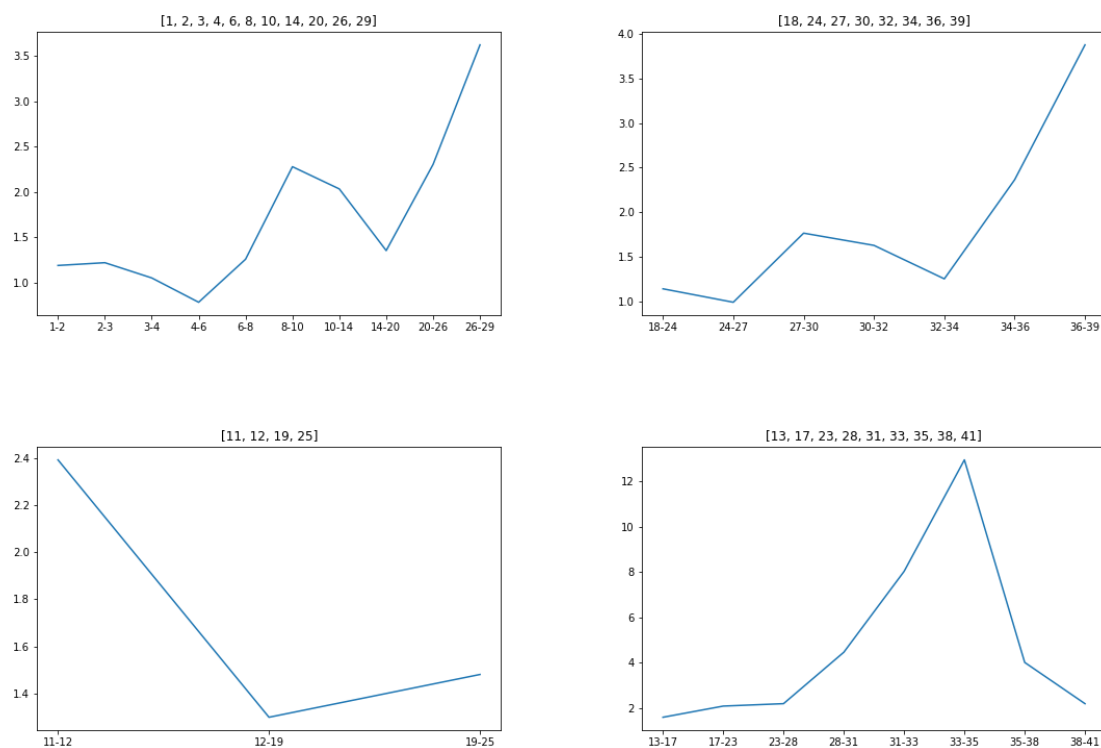

**Figure F9.** Distances between consecutive clusters for chain #1 (original strain, upper left), #18 (Alpha VoC B.1.1.7, upper right), #11 (bottom left) and #13 (bottom right)

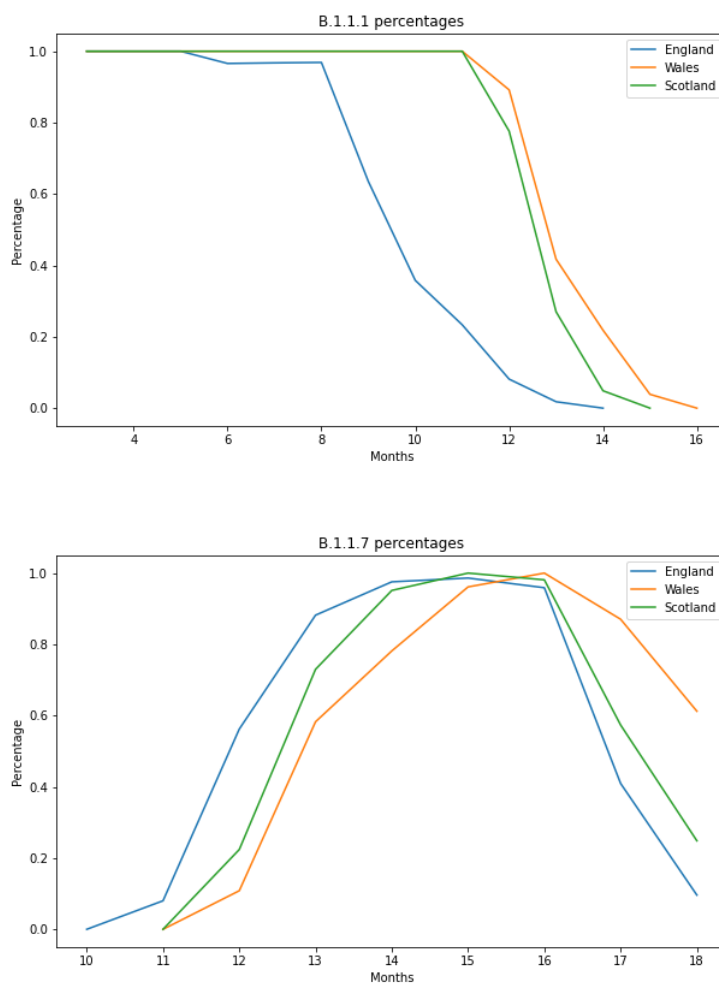

**Figure F10.** Time evolution comparisono for chains associated with the original strain (left) and Alpha VoC B.1.1.7 (right)
